# Supplementary material for: Measurement report: Per- and polyfluoroalkyl substances (PFAS) in particulate matter (PM 10 ) from activated sludge aeration
Source: Copernicus journal article supplement (doi:10.5194/egusphere-2024-3952), 2025-01-09
Supplement: Supplementary file 1 [file egusphere-2024-3952-supplement.pdf]

1 *Supplement of*

2 **Per- and polyfluoroalkyl substances (PFAS) in particulate matter**  
3 **(PM<sub>10</sub>) from activated sludge aeration**

4 Jishnu Pandamkulangara Kizhakkethil et al.

5 *Correspondence to:* Ivan Kourtchev ([ivan.kourtchev@coventry.ac.uk](mailto:ivan.kourtchev@coventry.ac.uk))

6

7

8

9

10

11

12

13

14

15

16

17

18

19

20

21

22

23

24

25 **Contents**

26 Table S1.....3

27 Table S2.....4

28 Table S3.....5

29 Table S4.....6

30 Figure S1.....7

31 Figure S2.....7

32 Figure S3.....8

33 Figure S4.....8

34

35

36

37

38

39

40

41

42

43

44

45

46

47

48

49

50

51

52

53

54

55

56

57

58 **Table S1** Per- and polyfluoroalkyl substances (PFAS) in the EPA 533 PAR mix (Wellington laboratories Inc, Canada)

| <b>PFAS analyte</b>                                  | <b>Abbreviation</b> |
|------------------------------------------------------|---------------------|
| Perfluorobutanoic acid                               | PFBA                |
| Perfluoropentanoic acid                              | PFPeA               |
| Perfluorohexanoic acid                               | PFHxA               |
| Perfluoroheptanoic acid                              | PFHpA               |
| Perfluorooctanoic acid                               | PFOA                |
| Perfluorononanoic acid                               | PFNA                |
| Perfluorodecanoic acid                               | PFDA                |
| Perfluoroundecanoic acid                             | PFUDA               |
| Perfluorododecanoic acid                             | PFDoA               |
| Hexafluoropropylene oxide dimer acid                 | HFPO-DA             |
| Perfluoro-3-methoxypropanoic acid                    | PFMPA               |
| Perfluoro-4-methoxybutanoic acid                     | PFMBA               |
| Perfluoro-3,6-dioxaheptanoic acid                    | 3,6-OPFHpA          |
| Perfluorobutane sulfonic acid                        | L-PFBS              |
| Perfluoropentane sulfonic acid                       | L-PFPeS             |
| Perfluorohexane sulfonic acid                        | PFHxS               |
| Perfluoroheptane sulfonic Acid                       | L-PFHpS             |
| Perfluorooctane Sulfonic Acid                        | PFOS                |
| 4:2 fluorotelomer sulfonate                          | 4:2FTS              |
| 6:2 fluorotelomer sulfonate                          | 6:2FTS              |
| 8:2 fluorotelomer sulfonate                          | 8:2FTS              |
| Sodium dodecafluoro-3H-4,8-dioxanonanoate            | NaDONA              |
| Perfluoro(2-((6-chlorohexyl)oxy)ethanesulfonic acid) | 9Cl-PF3ONS          |
| 11-chloroeicosafluoro-3-oxaundecane-1-sulfonic acid  | 11Cl-PF3OudS        |
| Perfluoro (2-ethoxyethane)sulfonic acid              | PFEESA              |

59

60

61

62

63

64

65 **Table S2** 16 <sup>13</sup>C labelled PFAS in the EPA 533 ES isotope dilution standard mix (Wellington laboratories Inc, Canada)

| <sup>13</sup> C labelled PFAS                               | Abbreviation |
|-------------------------------------------------------------|--------------|
| Perfluorobutanoic acid, <sup>13</sup> C <sub>4</sub>        | MPFBA        |
| Perfluorobutane sulfonic acid, <sup>13</sup> C <sub>3</sub> | M3PFBS       |
| Perfluoropentanoic acid, <sup>13</sup> C <sub>5</sub>       | M5PFPeA      |
| 4:2 fluorotelomer sulfonate, <sup>13</sup> C <sub>2</sub>   | M2-4:2FTS    |
| Perfluorohexanoic acid, <sup>13</sup> C <sub>5</sub>        | M5PFHxA      |
| Perfluoroheptanoic acid, <sup>13</sup> C <sub>4</sub>       | M4PFHpA      |
| Perfluorohexane sulfonic acid, <sup>13</sup> C <sub>3</sub> | M3PFHxS      |
| Perfluorooctanoic acid, <sup>13</sup> C <sub>8</sub>        | M8PFOA       |
| 6:2 fluorotelomer sulfonate, <sup>13</sup> C <sub>2</sub>   | M2-6:2FTS    |
| Perfluorononanoic acid, <sup>13</sup> C <sub>9</sub>        | M9PFNA       |
| Perfluorooctane sulfonic acid, <sup>13</sup> C <sub>8</sub> | M8PFOS       |
| Perfluorodecanoic acid, <sup>13</sup> C <sub>6</sub>        | M6PFDA       |
| 8:2 fluorotelomer sulfonate, <sup>13</sup> C <sub>2</sub>   | M2-8:2-FTS   |
| Perfluoroundecanoic acid, <sup>13</sup> C <sub>7</sub>      | M7PFUdA      |
| Hexafluoropropylene oxide, <sup>13</sup> C <sub>3</sub>     | M3HFPO       |
| Perfluorododecanoic acid, <sup>13</sup> C <sub>2</sub>      | MPFDoA       |

66

67

68

69

70

71

72

73

74

75

76

77

78

79

80

81 **Table S3** Concentrations of PFAS ( $\text{pg m}^{-3}$ ) in the  $\text{PM}_{10}$  samples (blank corrected) collected above the activated sludge (AS) tank in October  
 82 2023.

| <b><math>\text{PM}_{10}</math> PFAS concentrations (<math>\text{pg m}^{-3}</math>) - October 2023</b> |                       |              |                       |              |                       |              |                       |              |                                                   |                                             |
|-------------------------------------------------------------------------------------------------------|-----------------------|--------------|-----------------------|--------------|-----------------------|--------------|-----------------------|--------------|---------------------------------------------------|---------------------------------------------|
| <b>PFAS</b>                                                                                           | <b>2 October 2023</b> |              | <b>3 October 2023</b> |              | <b>4 October 2023</b> |              | <b>5 October 2023</b> |              | <b>Median<br/>(<math>\text{pg m}^{-3}</math>)</b> | <b>Mean (<math>\text{pg m}^{-3}</math>)</b> |
|                                                                                                       | <b>Day</b>            | <b>Night</b> | <b>Day</b>            | <b>Night</b> | <b>Day</b>            | <b>Night</b> | <b>Day</b>            | <b>Night</b> |                                                   |                                             |
| <b>PFBA</b>                                                                                           | CSB                   | CSB          | CSB                   | 13.78±0.71   | 19.60±0.77            | 10.38±0.80   | 14.53±0.64            | 15.24±0.83   | 12.08                                             | 9.19                                        |
| <b>PFBS</b>                                                                                           | <LOD                  | 0.24±0.01    | 0.34±0.03             | 0.35±0.02    | 0.34±0.03             | 0.33±0.02    | 0.43±0.04             | 0.55±0.01    | 0.34                                              | 0.32                                        |
| <b>PFHpA</b>                                                                                          | <LOD                  | <LOD         | <LOD                  | 0.31±0.04    | <LOD                  | 0.28±0.05    | <LOD                  | 0.39±0.04    | 0.00                                              | 0.12                                        |
| <b>PFHxS</b>                                                                                          | <LOD                  | <LOD         | <LOD                  | 0.15±0.01    | <LOD                  | 0.152±0.003  | <LOD                  | 0.18±0.01    | 0.00                                              | 0.06                                        |
| <b>PFOA</b>                                                                                           | 1.17±0.04             | 2.12±0.16    | 8.06±0.36             | 2.74±0.09    | 0.87±0.17             | 1.08±0.05    | 3.96±0.32             | 0.97±0.12    | 1.65                                              | 2.62                                        |
| <b>PFNA</b>                                                                                           | 0.95±0.11             | 1.32±0.01    | <LOD                  | 0.18±0.02    | <LOD                  | 0.25±0.03    | <LOD                  | 0.17±0.01    | 0.18                                              | 0.36                                        |
| <b>PFOS</b>                                                                                           | 12.48±0.51            | 17.35±0.15   | 0.72±0.03             | 0.81±0.02    | 0.44±0.07             | 1.79±0.07    | 0.71±0.03             | 1.14±0.04    | 0.98                                              | 4.43                                        |
| <b>PFDA</b>                                                                                           | 2.64±0.49             | 3.74±0.14    | <LOD                  | 0.24±0.02    | <LOD                  | 0.41±0.01    | <LOD                  | 0.29±0.02    | 0.26                                              | 0.91                                        |
| <b><math>\Sigma</math>PFAS</b>                                                                        |                       |              |                       |              |                       |              |                       |              | <b>15.49</b>                                      | <b>18.01</b>                                |

83 CSB- close to system blanks

84 LOD- Limit of detection

85

86

87

88

89

90

91

92 **Table S4** Concentrations of PFAS (pg m<sup>-3</sup>) in the PM<sub>10</sub> samples (blank corrected) collected above the AS tank in March 2024.

| <b>PM<sub>10</sub> PFAS concentrations (pg m<sup>-3</sup>) - March 2024</b> |                     |              |                     |              |                     |              |                     |              |                                       |                                     |
|-----------------------------------------------------------------------------|---------------------|--------------|---------------------|--------------|---------------------|--------------|---------------------|--------------|---------------------------------------|-------------------------------------|
| <b>PFAS</b>                                                                 | <b>4 March 2024</b> |              | <b>5 March 2024</b> |              | <b>6 March 2024</b> |              | <b>7 March 2024</b> |              | <b>Median<br/>(pg m<sup>-3</sup>)</b> | <b>Mean (pg<br/>m<sup>-3</sup>)</b> |
|                                                                             | <b>Day</b>          | <b>Night</b> | <b>Day</b>          | <b>Night</b> | <b>Day</b>          | <b>Night</b> | <b>Day</b>          | <b>Night</b> |                                       |                                     |
| <b>PFBA</b>                                                                 | CSB                 | 8.04±0.38    | CSB                 | 6.54±0.64    | CSB                 | 7.13±0.15    | CSB                 | 8.75±0.86    | 3.27                                  | 3.81                                |
| <b>PFBS</b>                                                                 | ND                  | 0.149±0.005  | 0.03±0.01           | 0.20±0.01    | ND                  | 0.21±0.01    | ND                  | 0.17±0.02    | 0.09                                  | 0.09                                |
| <b>PFHpA</b>                                                                | <LOD                | 0.22±0.02    | <LOD                | 0.23±0.02    | <LOD                | 0.26±0.03    | <LOD                | <LOD         | 0.00                                  | 0.09                                |
| <b>PFHxS</b>                                                                | <LOD                | 0.19±0.02    | <LOD                | 0.20±0.02    | <LOD                | 0.20±0.01    | <LOD                | 0.12±0.01    | 0.06                                  | 0.09                                |
| <b>PFOA</b>                                                                 | <LOD                | 1.62±0.13    | <LOD                | 1.70±0.01    | <LOD                | 1.21±0.07    | <LOD                | 0.51±0.02    | 0.26                                  | 0.63                                |
| <b>PFNA</b>                                                                 | <LOD                | <LOD         | <LOD                | <LOD         | <LOD                | <LOD         | <LOD                | <LOD         | 0                                     | 0                                   |
| <b>PFOS</b>                                                                 | <LOD                | 0.56±0.04    | 0.58±0.04           | 0.66±0.05    | 0.76±0.02           | 0.56±0.02    | 0.61±0.03           | 0.312±0.001  | 0.57                                  | 0.51                                |
| <b>PFDA</b>                                                                 | <LOD                | <LOD         | <LOD                | <LOD         | <LOD                | <LOD         | <LOD                | <LOD         | 0                                     | 0                                   |
| <b>∑PFAS</b>                                                                |                     |              |                     |              |                     |              |                     |              | 4.25                                  | 5.22                                |

93 CSB- close to system blanks

94 ND- Not detected

95 LOD- Limit of detection

96

97

98

99

100

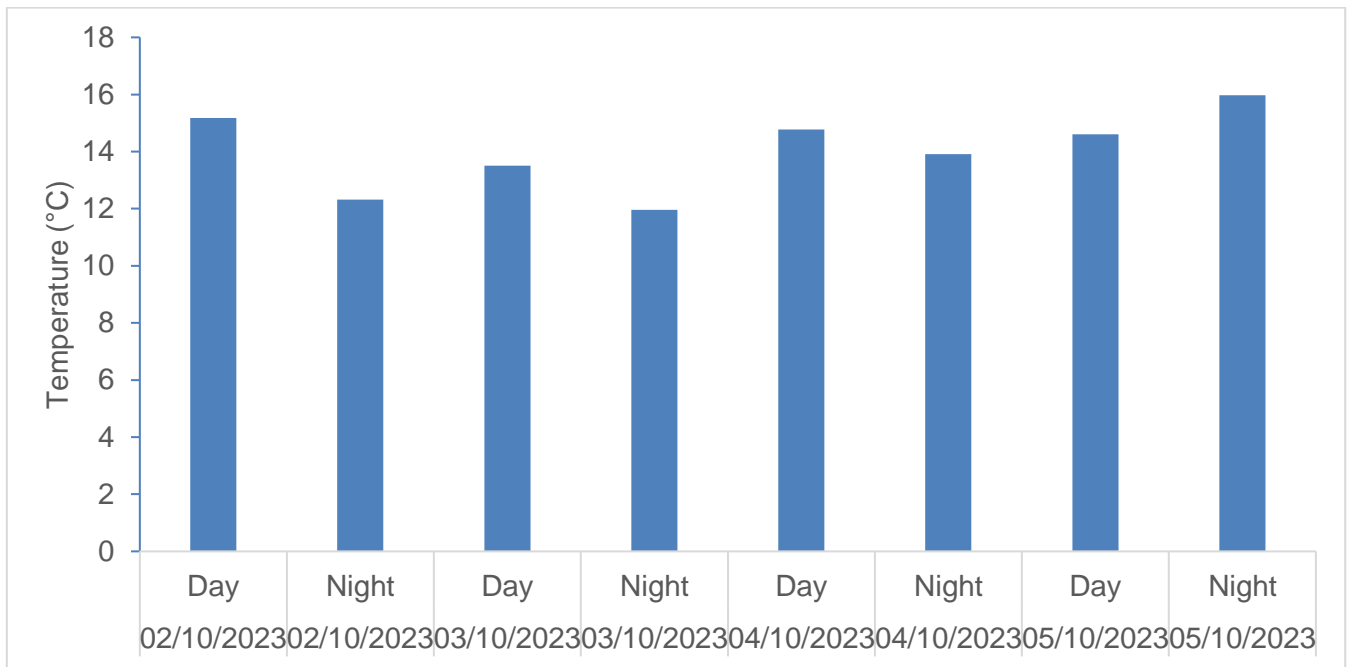

101

102 **Figure S1** Average temperature (°C) during the sampling periods in October 2023. The data was obtained from ERA5-Land  
 103 reanalysis data set. (<https://cds.climate.copernicus.eu/cdsapp#!/dataset/reanalysis-era5-land?tab=overview>)

104

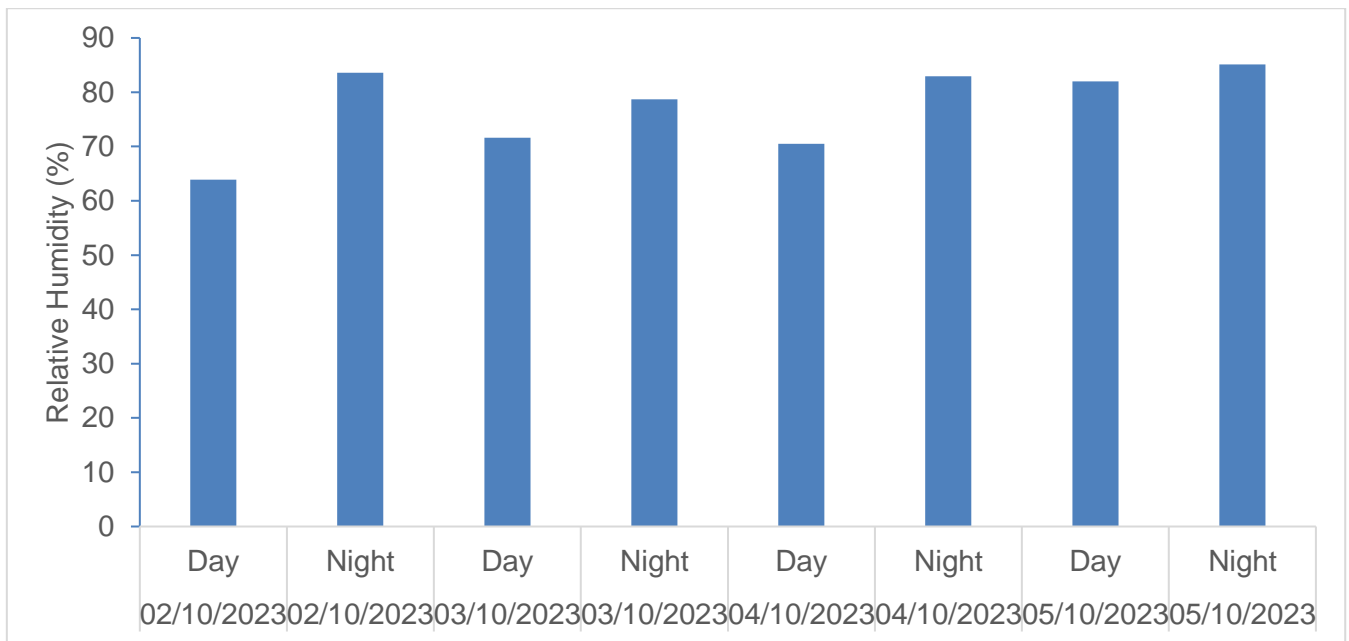

105

106 **Figure S2** Average relative humidity (%) during the sampling periods in October 2023. The data was obtained from ERA5-  
 107 Land reanalysis data set. (<https://cds.climate.copernicus.eu/cdsapp#!/dataset/reanalysis-era5-land?tab=overview>)

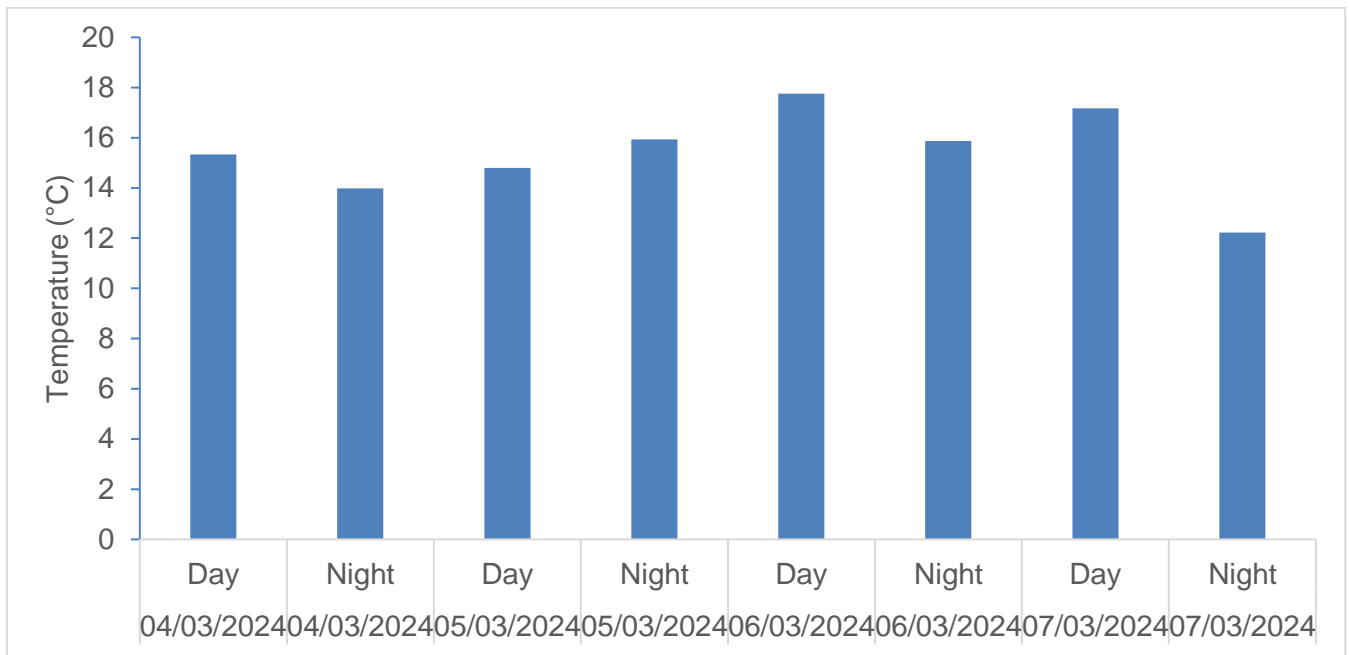

108

109 **Figure S3** Average temperature (°C) during the sampling periods in March 2024. The data was obtained from ERA5-Land  
 110 reanalysis data set. (<https://cds.climate.copernicus.eu/cdsapp#!/dataset/reanalysis-era5-land?tab=overview>)

111

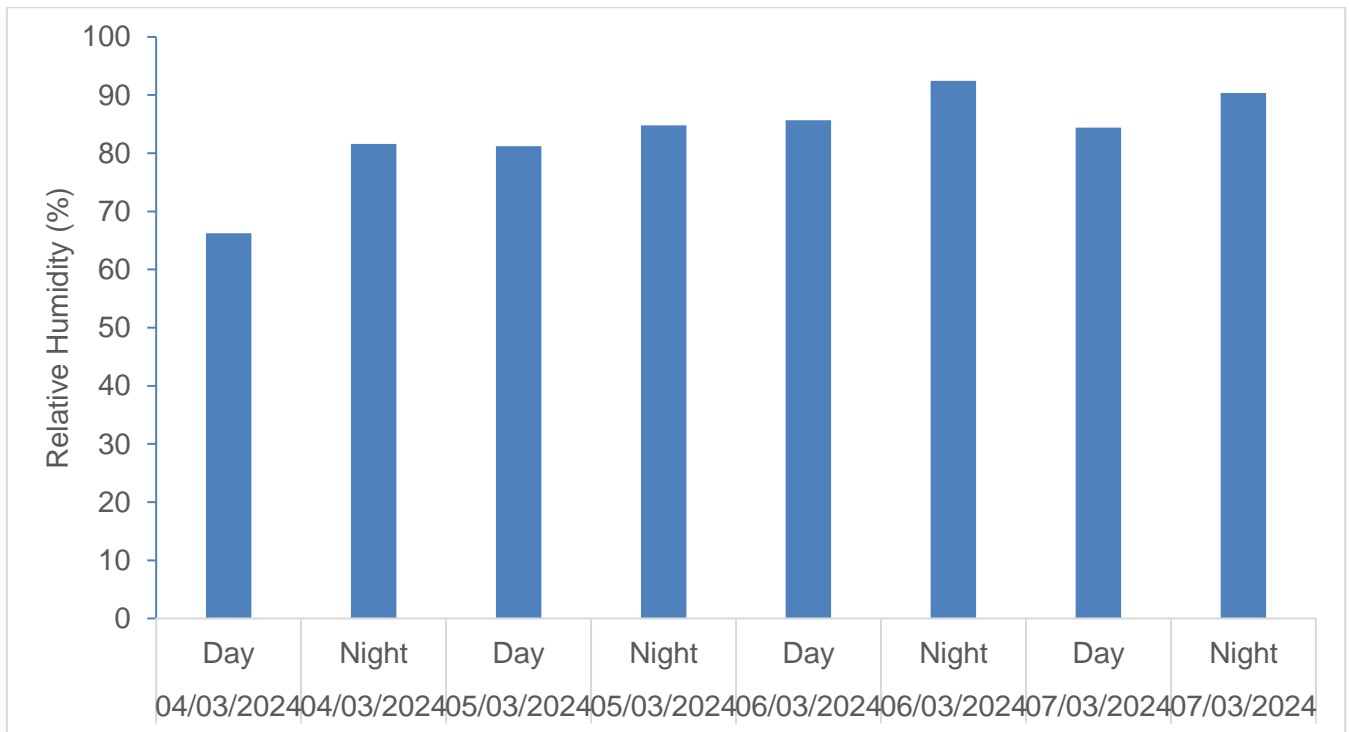

112



113 **Figure S4** Average relative humidity (%) during the sampling periods in March 2024. The data was obtained from ERA5-  
114 Land reanalysis data set. (<https://cds.climate.copernicus.eu/cdsapp#!/dataset/reanalysis-era5-land?tab=overview>)  
115
